# Supplementary material for: A dataset of images and morphological profiles of 30 000 small-molecule treatments using the Cell Painting assay
Source: PubMed Central journal article supplement (PMC5721342; doi:10.1093/gigascience/giw014), 2017-01-07

# A dataset of images and morphological profiles of 30,000 small-molecule treatments using the Cell Painting assay

Mark-Anthony Bray<sup>1</sup> [mbray@broadinstitute.org](mailto:mbray@broadinstitute.org)

Sigrun M. Gustafsdottir<sup>2</sup> (equal contributor) [sigrun.gustafsdottir@gmail.com](mailto:sigrun.gustafsdottir@gmail.com)

Vebjorn Ljosa<sup>1</sup> (equal contributor) [vebjorn@ljosa.com](mailto:vebjorn@ljosa.com)

Shantanu Singh<sup>1</sup> [shsingh@broadinstitute.org](mailto:shsingh@broadinstitute.org)

Katherine L. Sokolnicki<sup>1</sup> [kate.sokolnicki@gmail.com](mailto:kate.sokolnicki@gmail.com)

Joshua A. Bittker<sup>2</sup> [jbittker@broadinstitute.org](mailto:jbittker@broadinstitute.org)

Nicole E. Bodycombe<sup>2</sup> [nemmith@gmail.com](mailto:nemmith@gmail.com)

Vlado Dančik<sup>2</sup> [vdancik@broadinstitute.org](mailto:vdancik@broadinstitute.org)

Thomas P. Hasaka<sup>2</sup> [thasaka@gmail.com](mailto:thasaka@gmail.com)

C. Suk-Yee Hon<sup>2</sup> [cindyhon@broadinstitute.org](mailto:cindyhon@broadinstitute.org)

Melissa M. Kemp<sup>2</sup> [melissak.broad@gmail.com](mailto:melissak.broad@gmail.com)

Kejie Li<sup>2</sup> [kejie.li@biogen.com](mailto:kejie.li@biogen.com)

Deepika Walpita<sup>2</sup> [walpita@janelia.hhmi.org](mailto:walpita@janelia.hhmi.org)

Mathias J. Wawer<sup>2</sup> [mwawer@broadinstitute.org](mailto:mwawer@broadinstitute.org)

Todd R. Golub<sup>3</sup> [golub@broadinstitute.org](mailto:golub@broadinstitute.org)

Stuart L. Schreiber<sup>2</sup> [schreiber@broadinstitute.org](mailto:schreiber@broadinstitute.org)

Paul A. Clemons<sup>2</sup> [pclemons@broadinstitute.org](mailto:pclemons@broadinstitute.org)

Alykhan F. Shamji<sup>2</sup> [ashamji@broadinstitute.org](mailto:ashamji@broadinstitute.org)

Anne E. Carpenter<sup>1\*</sup> [anne@broadinstitute.org](mailto:anne@broadinstitute.org), <http://www.broadinstitute.org/~anne/>

<sup>1</sup> Imaging Platform, Broad Institute of Harvard and MIT, Cambridge, MA, USA

<sup>2</sup> Center for the Science of Therapeutics, Broad Institute of Harvard and MIT, Cambridge, MA, USA

<sup>3</sup> Cancer Program, Broad Institute of Harvard and MIT, Cambridge, MA USA

\*To whom correspondence should be addressed

## ABSTRACT

**Background:** Large-scale image sets acquired by automated microscopy of perturbed samples enable a detailed comparison of cell states induced by each perturbation, such as a small molecule from a diverse library. Highly multiplexed measurements of cellular morphology can be extracted from each image and subsequently mined for a number of applications.

**Findings:** This microscopy data set includes 919,874 five-channel fields of view representing 30,616 tested compounds, available at ‘The Cell Image Library’ repository. It also includes data files containing morphological features derived from each cell in each image, both at the single-cell level and population-averaged (i.e., per-well) level; the image analysis workflows that generated the morphological features are also provided. Quality-control metrics are provided as metadata, indicating fields of view that are out-of-focus or containing highly fluorescent material or debris. Lastly, chemical annotations are supplied for the compound treatments applied.

**Conclusions:** Because computational algorithms and methods for handling single-cell morphological measurements are not yet routine, the dataset serves as a useful resource for the wider scientific community applying morphological (image-based) profiling. The data set can be mined for many purposes, including small-molecule library enrichment and chemical mechanism-of-action studies, such as target identification. Integration with genetically-perturbed datasets could enable identification of small-molecule mimetics of particular disease- or gene-related phenotypes that could be useful as probes or potential starting points for development of future therapeutics.

## KEYWORDS

phenotypic profiling, high-content screening, image-based screening, cellular morphology, small-molecule library, U2OS

## DATA DESCRIPTION

### Background

High-throughput quantitative analysis of cellular image data has led to critical insights across many fields in biology[1,2]. While microscopy has enriched our understanding of biology for centuries, only recently has robotic sample preparation and microscopy equipment become widely available, together with large libraries of chemical and genetic perturbations. Concurrently, the advent of high-throughput imaging has also become an engine for pharmacological screening and basic research, by allowing multiparametric image-based interrogation of physiological processes at a large scale[3,4].

A typical imaging assay uses several fluorescent probes (or fluorescently-tagged proteins) simultaneously to stain cells, each labeling distinct cellular components in each sample. In this way, the morphological characteristics (or “phenotype”) of cells, tissues, or even whole organisms can be examined, along with the concomitant changes induced by the perturbants of choice[5–7].

1 Phenotypic profiling has emerged as a powerful tool to discern subtle differences among treated samples in a  
2 relatively unbiased manner. In contrast to a screening strategy, where a usually limited number of features are  
3 quantified to select for a known cellular phenotype, profiling relies on collecting a large suite of per-cell  
4 morphological features and then using statistical analysis to uncover subtle morphological patterns  
5 (“signatures”) by which the perturbations can be characterized. The “Cell Painting” assay used for the dataset  
6 presented here uses fluorescent markers to broadly stain a number of cellular structures in high-throughput  
7 format, while automated software extracts the single-cell image-based morphological features. Further analysis  
8 then aggregates the data into multivariate profiles of these features to compare signatures among sample  
9 treatments.  
10  
11  
12  
13

14 The applications of image-based profiling are many and diverse. A dataset comprising small-molecule  
15 perturbations, as presented here, can be used for small-molecule library enrichment (to create smaller libraries  
16 while retaining high diversity of phenotypic impact) and small-molecule mechanism-of-action studies, including  
17 target identification. Integration of this dataset with datasets resulting from other types of perturbations (e.g.,  
18 patient cell samples or genetically-perturbed samples) enables identification of small-molecule mimetics of  
19 particular disease- or gene-related phenotypes that could be useful as probes or potential starting points for  
20 development of future potential therapeutics.  
21  
22  
23  
24

## 25 **Data acquisition protocol and quality control**

26  
27 To maximize the morphological information extracted from a single assay, we sought to “paint the cell” with as  
28 many distinct fluorescent morphological markers as possible simultaneously. Balancing technical and cost  
29 considerations, we developed the Cell Painting assay protocol in which cells are stained for eight major  
30 organelles and sub-compartments, using a mixture of six well-characterized fluorescent dyes suited for use in  
31 high-throughput (Fig. 1)[8,9].  
32  
33  
34

35 The protocols for staining and imaging have been described in detail elsewhere[8,9]. Briefly, U2OS cells were  
36 plated in 384-well plates, then treated with each of 30,616 compounds in quadruplicate. Of these compounds,  
37 10,162 compounds came from the Molecular Libraries Small Molecule Repository (MLSMR)[10], 2,222 were  
38 drugs, natural products, and small- molecule probes that are part of the Broad Institute known bioactive  
39 compound collection, 274 were confirmed screening hits from the Molecular Libraries Program (MLP), and  
40 19,137 were novel compounds derived from diversity-oriented synthesis. Live cell staining was first performed  
41 to stain the mitochondria. After incubation, the cells were fixed with formaldehyde, permeabilized with Triton X-  
42 100, and stained with the remaining dyes to identify the nucleus (Hoechst), nucleoli and cytoplasmic RNA  
43 (SYTO 14), endoplasmic reticulum (concanavalin A), Golgi and plasma membrane (wheat germ agglutinin),  
44 and the actin cytoskeleton (phalloidin). Each of the 413 multi-well plates was imaged using an ImageXpress  
45 Micro XLS automated microscope (Molecular Devices, Sunnyvale, CA, USA), with five fluorescent channels at  
46 20x magnification, and 6 fields of view (sites) imaged per well (Table 1). Each image channel was then stored  
47 as a separate, grayscale image file in 16-bit TIF format. All raw image data is publicly available at ‘The Cell  
48 Image Library’ repository[11].  
49  
50  
51  
52  
53

54 The dataset available at GigaDB consists of the processed data derived from the acquired raw image data; the  
55 quantitative analysis of the images used a three-step pipeline workflow created with the modular open-source  
56 software CellProfiler[12] (Table 2; see also the Additional File and the “Availability of supporting data” section).  
57 First, an illumination pipeline estimated the heterogeneities in the spatial fluorescence distribution introduced  
58  
59  
60  
61  
62  
63  
64  
65

1 by the microscope optics. This approximation was calculated on a per-plate basis for each channel and yielded  
2 a collection of illumination correction functions (ICFs) for later use in intensity correction; we have found that  
3 this approach not only aids in cell identification but also improves accuracy in signature classification[13].  
4 Second, a quality control pipeline identified and labeled images with aberrations such as saturation artifacts  
5 and focal blur as described previously[14,15] (see also Additional File). Finally, a feature-extraction pipeline  
6 applied the ICFs to correct each channel, identified the nuclei, cell body and cytoplasm, and extracted the  
7 morphological features for each cell, depositing the results into a database for downstream analysis (see  
8 Additional File for a description of the extracted features). The extracted features include a broad array of  
9 cellular shape and adjacency statistics, as well as intensity and texture statistics that are measured in each  
10 channel. The pipelines, ICFs, and extracted morphological data are provided as a static snapshot in  
11 GigaDB[16] and in a *Gigascience* GitHub repository[17]. We note that the pipelines are configured for the  
12 archived CIL images; updates to the pipelines (and to the Cell Painting protocol in general) are provided  
13 online[18].

14 Many approaches exist to creating per-sample profiles based on the per-cell data from each replicate; we have  
15 found that producing profiles simply by averaging the cellular features across all cells for each well yielded  
16 good results in characterizing compounds[19]. These profiles are provided in GigaDB along with a listing of  
17 chemical annotations for the compounds applied. The downstream analysis of morphological profiling data is a  
18 field very much in flux at present; our own laboratory is developing an R package for this purpose on our lab's  
19 GitHub page[20].

## 20 Potential uses

21 Phenotypic profiling provides a powerful means for assessing the biological impact of molecular or genetic  
22 perturbations, and for grouping sample treatments based on similarity. The applications are diverse and  
23 powerful; we only briefly summarize here. The images and annotations provided in this Data Note have already  
24 been used in two published analyses from our own group; unsupervised clustering of a subset of 1,601  
25 bioactive compounds in a proof-of-principle study of compound mechanism of action  
26 (<https://www.broadinstitute.org/bbbc/BBBC022/>)[21] and small-molecule library enrichment based on the full  
27 set of 30,616 small molecules, a study in which morphological profiles successfully selected compound  
28 subsets with higher performance diversity than randomly-selected compounds[8]. Other profiling applications  
29 include compound target identification, assessment of toxicity, and lead hopping. Further detail on applications  
30 of profiling, including those relevant to genetic perturbation data sets as opposed to the small molecule data  
31 set described here, is available in a recent review [22].

32 This small-molecule data set could also be used in more conventional applications; for example, if any of the  
33 morphological phenotypes in the experiment are of particular interest (e.g., mitochondrial structure or nucleolar  
34 size), the images and profiles can be re-mined, as in a conventional high-content screen, to produce "hit lists"  
35 of compounds that perturb those morphologies. The images and data can also be used as a look-up-table to  
36 identify morphological phenotypes produced by compounds that are deemed of interest in any particular high-  
37 throughput screen.

## 38 AVAILABILITY AND REQUIREMENTS

- 39 • Project name: Supporting pipelines, scripts and metadata for cell painting data

- 1 • Project home page: <https://github.com/gigascience/paper-bray2017>
- 2 • Operating systems: Linux (for scripts), platform-independent (for pipelines)
- 3 • Programming language: Bash (for scripts)
- 4 • Other requirements: Unix (for scripts), CellProfiler 2.1.1 or later (for pipelines)
- 5 • License: GNU GPL v3

## 8 **AVAILABILITY OF SUPPORTING DATA**

10 The raw image data described in this article is available at ‘The Cell Image Library’ repository as Plates 24277-  
11 26796 ([http://www.cellimagelibrary.org/pages/project\\_20269](http://www.cellimagelibrary.org/pages/project_20269), CIL: 24277- CIL: 26796)[11]. The remainder of  
12 the dataset supporting the results of this article is available in the *GigaScience* GigaDB (as a static snapshot)  
13 and GitHub repositories [16,17]. On GigaDB, all data relating to a plate are contained in sub-folders under a  
14 parent folder named with a unique 5-digit identifier for each plate. This includes illumination correction  
15 functions, metadata related to sample treatment and image quality control, extracted morphological features,  
16 and profiles (Table 2). Each of the plate folders has been packed as tape archives (TAR, .tar) before being  
17 compressed using GNU Gzip (.gz), and can be downloaded individually. Regrettably, not all the raw images  
18 could be retrieved from our archives so not all plates have the full complement of 11,520 images; we have  
19 provided curation details listing the completeness of the archived data for each plate (Table 2). The GitHub  
20 repository also contains a bash shell script to facilitate downloading the entire CIL image set in batch, as well  
21 as image analysis pipelines and associated chemical annotation metadata. Updates to the pipelines (e.g., to  
22 accommodate updated software versions or updated versions of the protocol) can be found at our Cell Painting  
23 wiki[18]. An R package for the creation of well averages from single cell data can be found online[23].  
24  
25  
26  
27  
28  
29  
30

## 31 **COMPETING INTERESTS**

32  
33 The authors declare that they have no competing interests.  
34  
35  
36

## 37 **FUNDING**

38  
39 Research reported in this publication was supported in part by NSF CAREER DBI 1148823 (AEC).  
40  
41  
42

## 43 **AUTHOR CONTRIBUTIONS**

44  
45 MAB and AEC drafted the manuscript. MJW, SMG, CSYH, JAB, TRG, AEC, AFS, SLS, and PAC designed  
46 research. SMG, VL, MAM, KLS, MMK, TPH, and JAB performed research. MJW, KL, VL, NEB, MAB, VD,  
47 AEC, AFS, SLS, PAC, SS and MAB analyzed data. CSYH served as a Project Manager.  
48  
49  
50

## 51 **ACKNOWLEDGMENTS**

52  
53  
54 The authors thank David Orloff and Willy Wong from ‘The Cell Image Library’ for their efforts in assisting in the  
55 upload and annotation of the image portion of the dataset, and Chris Hunter, Scott Edmunds and Peter Li from  
56 Gigascience for validating data integrity of the image-derived portion of the dataset and providing helpful  
57  
58  
59  
60  
61  
62  
63  
64  
65

1 comments. We also thank Mohammad Hossein Rohban for expanding and contributing the compound  
2 annotations.  
3  
4  
5  
6  
7  
8  
9  
10  
11  
12  
13  
14  
15  
16  
17  
18  
19  
20  
21  
22  
23  
24  
25  
26  
27  
28  
29  
30  
31  
32  
33  
34  
35  
36  
37  
38  
39  
40  
41  
42  
43  
44  
45  
46  
47  
48  
49  
50  
51  
52  
53  
54  
55  
56  
57  
58  
59  
60  
61  
62  
63  
64  
65

## REFERENCES

1. Conrad C, Gerlich DW. Automated microscopy for high-content RNAi screening. *J. Cell Biol.* 2010;188:453–61.
2. Thomas N. High-content screening: a decade of evolution. *J. Biomol. Screen.* 2010;15:1–9.
3. Bickle M. The beautiful cell: high-content screening in drug discovery. *Anal. Bioanal. Chem.* 2010;398:219–26.
4. Boutros M, Heigwer F, Laufer C. Microscopy-Based High-Content Screening. *Cell.* 2015;163:1314–25.
5. Levsky JM, Singer RH. Gene expression and the myth of the average cell. *Trends Cell Biol.* 2003;13:4–6.
6. Snijder B, Pelkmans L. Origins of regulated cell-to-cell variability. *Nat. Rev. Mol. Cell Biol.* 2011;12:119–25.
7. Altschuler SJ, Wu LF. Cellular heterogeneity: do differences make a difference? *Cell.* 2010;141:559–63.
8. Wawer MJ, Li K, Gustafsdottir SM, Ljosa V, Bodycombe NE, Marton MA, et al. Toward performance-diverse small-molecule libraries for cell-based phenotypic screening using multiplexed high-dimensional profiling. *Proc. Natl. Acad. Sci. U. S. A.* 2014;111:10911–6.
9. Bray M-A, Singh S, Han H, Davis CT, Borgeson B, Gustafsdottir SM, et al. Cell Painting, a high-content image-based assay for morphological profiling using multiplexed fluorescent dyes. *Nat. Protoc.* 2016;11:1757–74.
10. Austin CP, Brady LS, Insel TR, Collins FS. NIH Molecular Libraries Initiative. *Science.* 2004;306:1138–9.
11. Gustafsdottir SM, Ljosa V, Sokolnicki KL, Bittker JA, Bodycombe NE, Bray M-A, et al. Human U2OS cells - compound cell-painting experiment [Internet]. The Cell Image Library. 2015. Available from: [http://www.cellimagelibrary.org/pages/project\\_20269](http://www.cellimagelibrary.org/pages/project_20269)
12. Kametsky L, Jones TR, Fraser A, Bray M-A, Logan DJ, Madden KL, et al. Improved structure, function and compatibility for CellProfiler: modular high-throughput image analysis software. *Bioinformatics.* 2011;27:1179–80.
13. Singh S, Bray M-A, Jones TR, Carpenter AE. Pipeline for illumination correction of images for high-throughput microscopy. *J. Microsc.* 2014;256:231–6.
14. Bray M-A, Fraser AN, Hasaka TP, Carpenter AE. Workflow and metrics for image quality control in large-scale high-content screens. *J. Biomol. Screen.* 2012;17:266–74.
15. Bray M-A, Carpenter AE. Quality control for high-throughput imaging experiments using machine learning in CellProfiler. In: Paul A. Johnston PA, Trask OJ Jr, editors. *Methods in Molecular Biology Series: High Content Imaging, Analysis and Screening: Applications in Basic Science and Drug Discovery.* Humana Press. *In press*
16. Bray, M, A; Gustafsdottir, S, M; Ljosa, V; Singh, S; Sokolnicki, K, L; Bittker, J, A; Bodycombe, N, E; Dančik, V; Hasaka, T, P; Hon, C, S; Kemp, M, M; Li, K; Walpita, D; Wawer, M, J; Golub, T, R; Schreiber, S, L; Clemons, P, A; Shamji, A, F; Carpenter, A, E (2016): Supporting data for "A dataset of images and

- 1 morphological profiles of 30,000 small-molecule treatments using the Cell Painting assay" GigaScience  
2 Database. <http://dx.doi.org/10.5524/100200>  
3
- 4 17. Source code from "A dataset of images and morphological profiles of 30,000 small-molecule treatments  
5 using the Cell Painting assay." [Internet]. GitHub. 2015 [cited 2016 Dec 15]. Available from:  
6 <https://github.com/gigascience/paper-bray2017>  
7
- 8 18. Supporting data files, documentation, and updated tips for "Cell Painting, a high-content image-based  
9 assay for morphological profiling using multiplexed fluorescent dyes" [Internet]. GitHub. 2016 [cited 2016 Dec  
10 6]. Available from: [https://github.com/carpenterlab/2016\\_bray\\_natprot](https://github.com/carpenterlab/2016_bray_natprot)  
11
- 12 19. Ljosa V, Caie PD, Ter Horst R, Sokolnicki KL, Jenkins EL, Daya S, et al. Comparison of methods for  
13 image-based profiling of cellular morphological responses to small-molecule treatment. *J. Biomol. Screen.*  
14 2013;18:1321–9.  
15
- 16 20. Cytomining Hackathon 2016 [Internet]. GitHub. 2016 [cited 2016 Dec 6]. Available from:  
17 <https://github.com/carpenterlab/cytomining-hackathon-wiki>  
18
- 19 21. Gustafsdottir SM, Ljosa V, Sokolnicki KL, Anthony Wilson J, Walpita D, Kemp MM, et al. Multiplex  
20 cytological profiling assay to measure diverse cellular states. *PLoS One.* 2013;8:e80999.  
21
- 22 22. Caicedo JC, Singh S, Carpenter AE. Applications in image-based profiling of perturbations. *Curr. Opin.*  
23 *Biotechnol.* 2016;39:134–42.  
24
- 25 23. cytominer: library for mining patterns in perturbation data [Internet]. GitHub. 2015 [cited 2016 Dec 6].  
26 Available from: <https://github.com/CellProfiler/cytominer>  
27  
28  
29  
30  
31  
32  
33  
34  
35  
36  
37  
38  
39  
40  
41  
42  
43  
44  
45  
46  
47  
48  
49  
50  
51  
52  
53  
54  
55  
56  
57  
58  
59  
60  
61  
62  
63  
64  
65



1  
2  
3  
4  
5  
6  
7  
8  
9  
10  
11  
12  
13  
14  
15  
16  
17  
18  
19  
20  
21  
22  
23  
24  
25  
26  
27  
28  
29  
30  
31  
32  
33  
34  
35  
36  
37  
38  
39  
40  
41  
42  
43  
44  
45  
46  
47  
48  
49  
50  
51  
52  
53  
54  
55  
56  
57  
58  
59  
60  
61  
62  
63  
64  
65

## FIGURE LEGENDS

**Figure 1:** Sample images of U2OS cells from the small-molecule Cell Painting experiment. Images are shown from a DMSO well (negative control, top row) and a parabendazole well (bottom row). The columns display the five channels imaged in the Cell Painting assay protocol; see Table 1 for details about the stains and channels imaged.

1 **TABLES AND CAPTIONS**  
 2  
 3  
 4

5 **Table 1:** Details of dyes, stained cellular sub-compartments and channels imaged in the Cell Painting assay.

| Dye                                                                                         | Organelle or cellular component              | Channel name |             |
|---------------------------------------------------------------------------------------------|----------------------------------------------|--------------|-------------|
|                                                                                             |                                              | CellProfiler | ImageXpress |
| Hoechst 33342                                                                               | Nucleus                                      | DNA          | w1          |
| Concanavalin A/Alexa Fluor 488 conjugate                                                    | Endoplasmic reticulum                        | ER           | w2          |
| SYTO 14 green fluorescent nucleic acid stain                                                | Nucleoli, cytoplasmic RNA                    | RNA          | w3          |
| Phalloidin/Alexa Fluor 568 conjugate, wheat germ agglutinin (WGA)/Alexa Fluor 555 conjugate | F-actin cytoskeleton, Golgi, plasma membrane | AGP          | w4          |
| MitoTracker Deep Red                                                                        | Mitochondria                                 | Mito         | w5          |

35 The CellProfiler channel name refers to the name given by the software to each channel; this nomenclature  
 36 also applies to the naming of the extracted morphological features. The ImageXpress channel name refers to  
 37 the text in the raw image file name identifying the acquired wavelength.  
 38  
 39  
 40  
 41  
 42  
 43  
 44  
 45  
 46  
 47  
 48  
 49  
 50  
 51  
 52  
 53  
 54  
 55  
 56  
 57  
 58  
 59  
 60  
 61  
 62  
 63  
 64  
 65

**Table 2:** Summary of the raw and intermediately processed data included in this Data Descriptor, and nomenclature in the *Gigascience* GigaDB and GitHub repositories. <plate\_ID> refers to the 5-digit plate ID assigned by the ImageXpress microscope system.

| Data item                                | Location                                                         | Description                                                                                                                                                                                                                                                                                                                                            |
|------------------------------------------|------------------------------------------------------------------|--------------------------------------------------------------------------------------------------------------------------------------------------------------------------------------------------------------------------------------------------------------------------------------------------------------------------------------------------------|
| Raw fluorescence images                  | The Cell Image Library[11],<br>GitHub:<br>download_cil_images.sh | Five fluorescence channels, acquired at 6 fields of view per well at 20× magnification (0.656 μm/pixel). The experiment comprises 413 plates in 384-well format (Plates 24277-26796). We include a bash shell script to facilitate downloading the archives.                                                                                           |
| CellProfiler pipelines                   | GitHub: pipelines/ folder,<br>GigaDB: pipelines.zip              | CellProfiler software was used to correct for uneven illumination, perform quality control and delineate cells into nuclei, cell body and cytoplasmic sub-compartments and measure morphological features for each sub-compartment.                                                                                                                    |
| Illumination correction functions (ICFs) | GigaDB:<br><plate_ID>/illumination_correction_functions          | An ICF is an estimation of the spatial illumination distribution introduced by the microscopy optics. There is one ICF per channel, for each plate.                                                                                                                                                                                                    |
| Quality control metadata                 | GigaDB:<br><plate_ID>/quality_control                            | Each field of view is assessed for the presence of two artifacts (focal blur and saturated objects), and assigned a label of 1 if present, and 0 if not.                                                                                                                                                                                               |
| Extracted morphological features         | GigaDB:<br><plate_ID>/extracted_features                         | Three data tables consisting of (a) per-image cellular statistics (e.g. cell count), (b) per-cell size, shape, intensity, textural and adjacency statistics measured for the nuclei, cytoplasm, and cell body, and (c) experimental metadata (e.g., compound applied). Includes a MySQL dump file for importing the data tables into a MySQL database. |
| Morphological profiles                   | GigaDB: <plate_ID>/profiles                                      | Per-well averages of each extracted morphological feature computed across the cells.                                                                                                                                                                                                                                                                   |
| Image curation statistics                | GigaDB, GitHub:<br>image_curation_statistics.csv                 | A summary of image statistics, such as the number of images, wells, and sites in the plates archived at The Cell Image Library, the number of sites with quality measures and the number of wells with morphological profiles.                                                                                                                         |
| Chemical annotations                     | GigaDB, GitHub:<br>chemical_annotations.csv                      | Chemical annotations including the compound names, SMILES, and PubChem identifiers (CID/SID)                                                                                                                                                                                                                                                           |

## Additional File: Workflows and processed data available at GigaDB and GitHub repositories

### Availability of supporting data

The raw image data described in this article is available at ‘The Cell: an Image Library’ (CIL) repository as Plates 24277-26796 ([http://www.cellimagelibrary.org/pages/project\\_20269](http://www.cellimagelibrary.org/pages/project_20269), CIL: 24277- CIL: 26796)[1]. The remainder of the dataset supporting the results of this article is available in the *GigaScience* GigaDB (as a static snapshot)[2] and GitHub[3] repositories. On GigaDB, all data relating to a plate are contained in sub-folders under a parent folder named with a unique 5-digit identifier for each plate. This includes illumination correction functions, metadata related to sample treatment and image quality control, extracted morphological features, and profiles (Table 2 in the main manuscript). Each of the plate folders has been packed as tape archives (TAR, .tar) before being compressed using GNU Gzip (.gz), and can be downloaded individually. Regrettably, not all the raw images could be retrieved from our archives so not all plates have the full complement of 11,520 images; we have provided curation details listing the completeness of the archived data for each plate (Table 2 in the main manuscript). The GitHub repository also contains a bash shell script to facilitate downloading the entire CIL image set in batch, as well as image analysis pipelines and associated chemical annotation metadata. Updates to the pipelines (e.g., to accommodate updated software versions or updated versions of the protocol) can be found at our Cell Painting wiki ([https://github.com/carpenterlab/2016\\_bray\\_natprot](https://github.com/carpenterlab/2016_bray_natprot)). An R package for the creation of well averages from single cell data can be found at <https://github.com/CellProfiler/cytominr>. Any publication arising from the use of the deposited data must acknowledge the source of the dataset.

### Image data

The raw image data posted at CIL are archived by plate, with each plate’s worth of data divided into five ZIP files, one for each Cell Painting channel. The ZIP file nomenclature is *<5-digit plate ID>-<channel ID>* where *<channel ID>* corresponds to:

- Hoechst : Hoechst 33342 channel (w1)
- ERSyto: Concanavalin A channel (w2)
- ERSytoBleed: SYTO 14 channel (w3)
- Ph\_golgi: WGA/phalloidin channel (w4)
- Mito: MitoTracker Deep Red channel (w5)

### CellProfiler pipelines

The raw image data are analyzed by the open-source software CellProfiler[4]. The GigaScience GitHub repository includes a set of three modular workflows (or “pipelines”) for use with CellProfiler to handle three tasks: (a) illumination correction, (b) image quality control, and (c) morphological feature extraction. When a pipeline is loaded into CellProfiler, annotations can be viewed for each module of the pipeline, with details on the purpose of the module and considerations in making adjustments to the settings. The annotations may be found at the top of the settings, in the panel labeled “Module notes”; please refer to them for documentation relating to the image processing itself.

The illumination correction (illum.cppipe), quality control (quality\_control.cppipe) and analysis (analysis.cppipe) pipelines were created with CellProfiler 2.1.1. All three pipelines are in the “pipelines” folder file in the

1 GigaScience GitHub repository and are adapted to work with the archived CIL images. Current and prior  
2 versions of CellProfiler may be found at <http://cellprofiler.org/download.html>.

3  
4  
5 The three pipelines provided in the GitHub repository make use of specialized Input modules which prompt for  
6 images from the user, collect metadata from the images, determine the correspondences between channels  
7 and assign user-specified names to the channels. We specifically chose to include these versions of the  
8 pipeline for compatibility with the CIL image set and to make them more convenient to adapt to a researcher's  
9 own images, which can be helpful for small-scale processing (~1,000 fields of view or less).

10  
11  
12 For large-scale processing, we recommend the use of the LoadData module rather than the Input modules;  
13 this module requires a comma-delimited file (CSV) as input. All the information produced by the Input modules  
14 is instead organized in this CSV. In order to convert the GigaScience pipelines for use at large-scale, follow the  
15 steps below for each pipeline:

- 16 ● Open the pipeline in CellProfiler.
- 17 ● Drag-and-drop the unzipped folder(s) of CIL images into the Images module. All five channels of images  
18 should be included in this operation. For the analysis pipeline, drag-and-drop the illumination correction  
19 functions as well (see the next section for more details on these files).
- 20 ● Select *File > Export > Image Set Listing...* from the main menu, and enter the name of the CSV to be  
21 exported.
- 22 ● To avoid ambiguity in image loading, we recommend opening the CSV in the spreadsheet editor of your  
23 choice (e.g. Excel) and removing all columns **except** the following:
  - 24 ○ Columns prefixed with "FileName" or "PathName"
  - 25 ○ Metadata\_PlateID
  - 26 ○ Metadata\_CPD\_WELL\_POSITION
  - 27 ○ Metadata\_Site
- 28 ● In CellProfiler, click the '+' button at the bottom-left, and from the dialog that appears, select the LoadData  
29 module located under the "File Processing" category. Click the "+ Add to Pipeline" button to insert it into the  
30 pipeline. Click 'Yes' to the legacy module prompt.
- 31 ● If the LoadData module is not the first module in the pipeline, select the module and click the '^' or 'v'  
32 buttons at the bottom-left to move it into position.
- 33 ● For the "Name of the file" setting, click the browse button and select the modified CSV created above.
- 34 ● For the "Base image location" setting, select "None".
- 35 ● (For the illumination correction pipeline only) For the "Group images by metadata?" setting, select "Yes".  
36 and select "PlateID" from the "Select metadata tags for grouping" listbox.

37  
38  
39 Note that we also maintain updated versions of the Cell Painting pipelines (not specifically adapted to the  
40 archived CIL images described in this paper, but kept up to date with latest versions of CellProfiler at our Cell  
41 Painting wiki at [https://github.com/carpenterlab/2016\\_bray\\_natprot](https://github.com/carpenterlab/2016_bray_natprot). In order to configure these updated  
42 pipelines for use with the CIL images, the Input modules need to be altered as follows:

- 43 ● Metadata module
  - 44 ○ Change the metadata extraction method using the image filename as the source to  
45 `_(?P<CPD_WELL_POSITION>[a-p][0-9]{2})_s(?P<Site>[0-9])_w(?P<ChannelNumber>[0-9])`
  - 46 ○ Change the second metadata extraction method with folder as the source to  
47 `[\\/] (?P<PlateID>[0-9]{5})`
- 48 ● NamesAndTypes module:
  - 49 ○ For the rule criteria settings, set/confirm the proper channel-to-name correspondences, i.e,  
50 OrigDNA: Metadata ChannelNumber = 1, OrigER: Metadata ChannelNumber = 2, OrigRNA:  
51 Metadata ChannelNumber = 3, OrigAGP: Metadata ChannelNumber = 4, OrigMito: Metadata  
52 ChannelNumber = 5

- For the metadata matching setting, select “PlateID” for the top row and “CPD\_WELL\_POSITION” for the second row, for all channels.
- (Illumination correction pipeline only) Groups module: For the metadata category setting, select “PlateID”.

Our best practices for running CellProfiler pipelines at large-scale are described at <https://github.com/CellProfiler/CellProfiler/wiki/Adapting-CellProfiler-to-a-LIMS-environment>.

## Illumination correction functions

Illumination heterogeneities introduced by the microscope optics can adversely affect intensity-based measurements and even impact cellular identification and segmentation. The illumination correction functions (ICF) included in this data set are post-hoc estimates of the microscope illumination distribution; heterogeneities are captured by the ICF and are used to correct the pixel intensities of the raw images. Each ICF is named according to the originating plate and associated channel: *<5-digit plate ID>\_Illum<channel ID>.mat*, .e.g. *24278\_IllumDNA.mat*; see Table 1 for the CellProfiler channel nomenclature.

The ICFs are in MATLAB (.mat) format to accommodate floating-point values, and are located in the “illumination\_correction\_functions” sub-folder in the archived file.

## Extracted morphological features

The image-based morphological features extracted by CellProfiler are deposited into two data tables in comma-delimited text format (.csv); these are structured according to the following schema:

- An *image table* (“image.csv”) where each row corresponds to an image acquired at a unique field of view (site) and the columns contain the image data (e.g., the plate/well/site metadata, the name of the treatment condition, the filename of the original image, calculated segmentation thresholds etc). The metadata fields are as follows:
  - TableNumber: An integer index, used when multiple experiments are combined together into one table.
  - ImageNumber: An integer index; references each site (i.e., field of view) acquired.
  - Image\_FileName\_OrigER: Filename for the concanavalin A channel.
  - Image\_FileName\_OrigDNA : Filename for the Hoechst 33342 channel.
  - Image\_FileName\_OrigMito: Filename for the MitoTracker Deep Red channel.
  - Image\_FileName\_OrigAGP: Filename for the WGA/phalloidin channel.
  - Image\_FileName\_OrigRNA: Filename for the SYTO 14 channel.
  - Image\_Metadata\_PlateID: The 5-digit identifier given by the ImageXpress microscope labeling the plate.
  - Image\_Metadata\_CPD\_WELL\_POSITION: The well identifier as an alphanumeric label. Rows are labelled from ‘A’ to ‘P’, and columns are labelled from ‘01’ - ‘24’.
  - Image\_Metadata\_Site: The identifier for the fields of view in a well, numbered 1 to 6.
- An *object table* (“cells.csv”) in which each row represents an object (e.g., cells) from a given image and the columns contain the collected object measurements (e.g., area of the cell, intensity of DNA stain in the nucleus, location of the cell in the original image, etc). This table contains the TableNumber and ImageNumber indices described above, as well as an object index (column header: ObjectNumber) integers referencing each object (e.g., nucleus) identified in an image.
- A *metadata table* (“metadata.csv”) where each row corresponds to a particular plate/well combination and the columns contain the experimental metadata (e.g., the plate/well/site identifiers, the name of the treatment condition, etc). The metadata fields are as follows:

- 1 ○ Image\_Metadata\_PlateID: The 5-digit identifier given by the ImageXpress microscope labeling the  
2 plate.
- 3 ○ Image\_Metadata\_CPD\_WELL\_POSITION: The well identifier as an alphanumeric label. Rows are  
4 labelled from 'A' to 'P', and columns are labelled from '01' - '24'.
- 5 ○ Image\_Metadata\_ASSAY\_WELL\_ROLE: Describes whether the well is a control ("mock") or treatment  
6 ("compound").
- 7 ○ Image\_Metadata\_BROAD\_ID: The internal identifier from the Broad Institute's compound management  
8 department.
- 9 ○ Image\_Metadata\_CPD\_MMOL\_CONC: The millimolar concentration from the compound stock plate;  
10 note that this is not the same as the final concentration used in the assay well.

11 A MySQL dump file is included to facilitate uploading the image and object tables to a MySQL database. More  
12 details on each feature can be found in the corresponding module documentation in CellProfiler.  
13

14  
15 The csv's of morphological features are in the "extracted\_features" folder sub-folder contained in the archived  
16 file.  
17

## 18 Image quality control

19 To determine image data quality, we used a previously validated semi-automated workflow which labels  
20 images if they contain brightly fluorescing artifacts or are out-of-focus[5,6]. Briefly, a suite of whole-image  
21 measurements (e.g., intensity statistics, grayscale correlation and saturation percentage) are extracted from  
22 each image using CellProfiler. These image features form the basis for a supervised machine learning  
23 workflow using the open-source software package CellProfiler Analyst[7,8]. The training phase of the workflow  
24 consists of the researcher assembling a collection of example images, some of which are identified as  
25 containing artifacts and others as normal, i.e., artifact-free. Care is taken to ensure that the images originate  
26 across the entire experiment (as opposed to a narrow selection of wells or plates or well/column locations), to  
27 avoid overfitting. Based on this training set, a machine learning algorithm is applied to determine an initial  
28 classifier to discriminate aberrant from normal images. The software then presents the researcher with new  
29 samples of artifactual or artifact-free images, at which point they can correct errors and re-train the classifier.  
30 This workflow proceeds iteratively until the researcher is satisfied that the classifier achieves sufficient  
31 accuracy. The final classifier is then used to annotate all the images in the full experiment as being either  
32 saturated, blurred, or artifact-free.  
33

34 The data tables of quality control annotations are in comma-delimited text format (.csv) in the "quality\_control"  
35 folder sub-folder under the parent plate-ID folder contained in the archived file. In addition to the plate, well,  
36 and site metadata described above, the csv contains two metadata columns describing each field of view:

- 37 ● Image\_Metadata\_isBlurry: Equal to 1 if the image is out-of-focus, 0 otherwise.
- 38 ● Image\_Metadata\_isSaturated: Equal to 1 if image saturation artifacts are present, 0 otherwise.

39 In addition, the csv contains the values of the quality control metrics on which the classifier is based, for use if  
40 a researcher chooses to apply another classifier; these column headers are prefixed with  
41 "Image\_ImageQuality\_".  
42

## 43 Morphological profiles

44 We have previously published a comparison of methods for creating per-well profiles from the individual cell  
45 measurements from each image/site within the well[9]. Here, the profiles are given as a population average by  
46 computing the mean for each of the  $N$  morphological features across cells from all 6 sites per well, producing  
47 an  $N$ -dimensional data vector for each well.  
48  
49  
50  
51  
52  
53  
54  
55  
56

1  
2 The data tables of profiles are formatted as comma-delimited text (.csv) with the same feature nomenclature as  
3 the object table described above; they are located in the “profiles” sub-folder contained in the archived file.  
4  
5

## 6 Image curation statistics

8 A spreadsheet summarizing the curation statistics is included as comma-delimited text (.csv). The following  
9 items are listed for each plate:

- 11 ● Plate ID: 5-digit identifier given by the ImageXpress microscope labeling the plate.
- 12 ● Num\_CIL\_images: Total number of images for the plate hosted at The Cell Image Library (CIL).
- 13 ● Num\_CIL\_wells: Total number of wells represented in the plate hosted at CIL which have >1  
14 site (i.e., field of view) included.
- 15 ● Num\_CIL\_complete wells: Total number of wells which have all sites included.
- 16 ● Num\_CIL\_sites: Total number of sites which have >1 channel included.
- 17 ● Num\_CIL\_complete\_sites: Total number of sites which have all channels included.
- 18 ● Num\_QC\_stats: Total number of sites for which quality control data is included.
- 19 ● Num\_blurry\_sites: Total number of sites labelled as blurry/out-of-focus by the quality control  
20 workflow.
- 21 ● Num\_saturated\_sites: Total number of sites labelled as containing saturation artifacts by the  
22 quality control workflow.
- 23 ● Num\_well\_profiles: Total number of wells which have morphological profiles included in the  
24 GigaDB repository.

## 31 Chemical compound annotations

33 As mentioned above, each folder containing per-plate data also contains a corresponding table of treatment  
34 metadata. We have also included a csv containing metadata for many of the compounds from Broad Institute’s  
35 Chemical Biology Informatics Platform (CBIP), reference by BROAD\_ID (the internal identifier from the Broad  
36 Institute’s compound management department) and including (where applicable) compound names, simplified  
37 molecular-input line-entry system annotations (SMILES), MLSMR sample identifiers, and PubChem compound  
38 identifiers (CID) and substance identifiers (SID). The latter two items are useful for querying the PubChem  
39 Compound Database (<http://www.ncbi.nlm.nih.gov/pccompound>).  
40  
41  
42  
43

## 44 References

- 47 1. Gustafsdottir SM, Ljosa V, Sokolnicki KL, Bittker JA, Bodycombe NE, Bray M-A, et al. Human U2OS cells -  
48 compound cell-painting experiment [Internet]. The Cell Image Library. 2015. Available from:  
49 [http://www.cellimagelibrary.org/pages/project\\_20269](http://www.cellimagelibrary.org/pages/project_20269)  
50
- 51 2. Bray M-A, Gustafsdottir SM, Ljosa V, Singh S, Sokolnicki KL, Bittker JA, et al. Supporting data for “A dataset  
52 of images and morphological profiles of 30,000 small-molecule treatments using the Cell Painting assay”  
53 [Internet]. GigaDB. 2016. Available from: <http://gigadb.org/dataset/100200>  
54
- 55 3. Source code from “A dataset of images and morphological profiles of 30,000 small-molecule treatments  
56 using the Cell Painting assay.” [Internet]. GitHub. 2015 [cited 2016 Dec 15]. Available from:  
57 <https://github.com/gigascience/paper-bray2017>  
58
- 59 4. Kamentsky L, Jones TR, Fraser A, Bray M-A, Logan DJ, Madden KL, et al. Improved structure, function and  
60 compatibility for CellProfiler: modular high-throughput image analysis software. *Bioinformatics*. 2011;27:1179–  
61 80.  
62  
63  
64  
65



- 1 5. Bray M-A, Fraser AN, Hasaka TP, Carpenter AE. Workflow and metrics for image quality control in large-  
2 scale high-content screens. *J. Biomol. Screen.* 2012;17:266–74.  
3
- 4 6. Bray M-A, Carpenter AE. Quality control for high-throughput imaging experiments using machine learning in  
5 CellProfiler. In: Paul A. Johnston PA, Trask OJ Jr, editors. *Methods in Molecular Biology Series: High Content*  
6 *Imaging, Analysis and Screening: Applications in Basic Science and Drug Discovery.* Humana Press,;  
7
- 8 7. Jones TR, Kang IH, Wheeler DB, Lindquist RA, Papallo A, Sabatini DM, et al. CellProfiler Analyst: data  
9 exploration and analysis software for complex image-based screens. *BMC Bioinformatics.* 2008;9:482.  
10
- 11 8. Jones TR, Carpenter AE, Lamprecht MR, Moffat J, Silver SJ, Grenier JK, et al. Scoring diverse cellular  
12 morphologies in image-based screens with iterative feedback and machine learning. *Proc. Natl. Acad. Sci. U.*  
13 *S. A.* 2009;106:1826–31.  
14
- 15 9. Ljosa V, Caie PD, Ter Horst R, Sokolnicki KL, Jenkins EL, Daya S, et al. Comparison of methods for image-  
16 based profiling of cellular morphological responses to small-molecule treatment. *J. Biomol. Screen.*  
17 2013;18:1321–9.  
18  
19  
20  
21  
22  
23  
24  
25  
26  
27  
28  
29  
30  
31  
32  
33  
34  
35  
36  
37  
38  
39  
40  
41  
42  
43  
44  
45  
46  
47  
48  
49  
50  
51  
52  
53  
54  
55  
56  
57  
58  
59  
60  
61  
62  
63  
64  
65

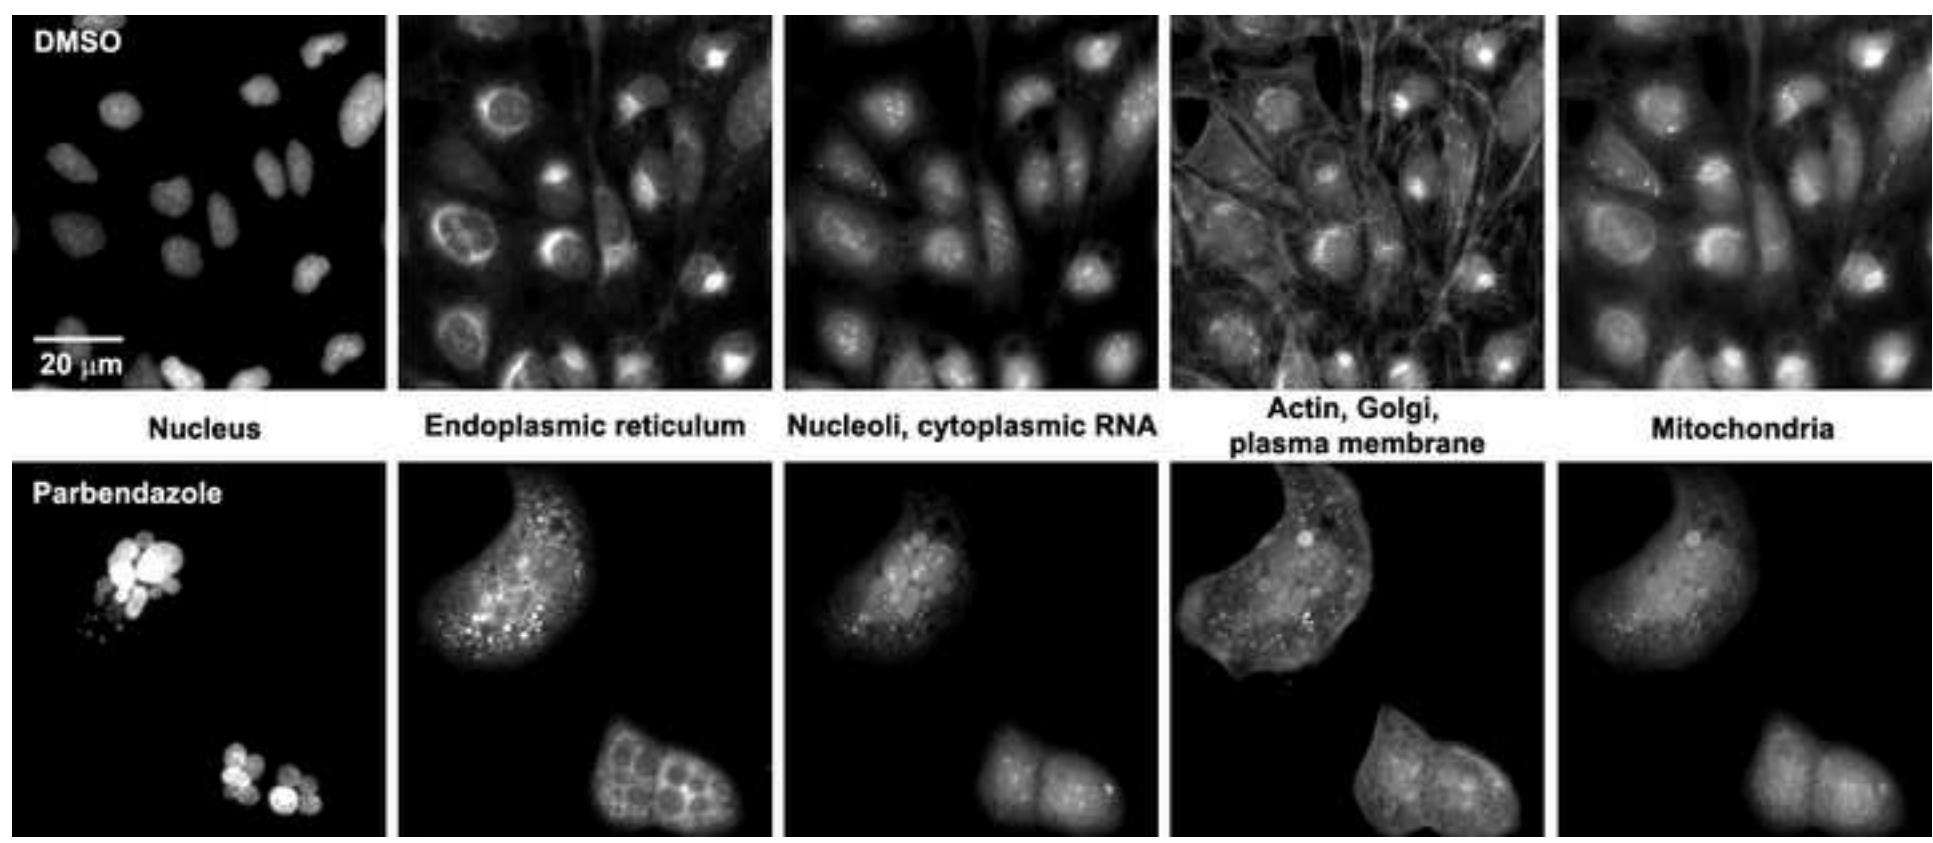

Supplement: giw014_giga-d-16-00012_revision-2.pdf [file giw014_giga-d-16-00012_revision-2.pdf]
