# Supplementary material for: A dataset of images and morphological profiles of 30 000 small-molecule treatments using the Cell Painting assay
Source: PubMed Central journal article supplement (PMC5721342; doi:10.1093/gigascience/giw014), 2017-01-07
Supplement: giw014_response-to-reviewer-comments_revisions-1.pdf [file giw014_response-to-reviewer-comments_revisions-1.pdf]

Revised version with data sections formatted correctly here.
